# Supplementary material for: A phase 1 dose-escalation study of low-dose lenalidomide maintenance post-allogeneic stem cell transplantation for high-risk acute myeloid leukaemia or myelodysplastic syndrome
Source: Research Square preprint supplement (doi:10.21203/rs.3.rs-3353988/v1), 2023-09-29
Supplement: Supplementary file 1 [file 049058bf63f340146cf93ddb.xlsx]

## Sheet: Sheet1
Table 2. All-grade haematologic and non-haematologic treatment emergent adverse events.
	Grade 1-2, N (%)	Grade 3-4, N (%)	Total, N (%)
Non-haematologic
Bilirubin increased	1 (2)	-	1 (2)
Diarrhoea	1 (2)	-	1 (2)
Dyspnoea	2 (4)	-	2 (4)
Fatigue	3 (7)	-	3 (6)
Headache	2 (4)	-	2 (4)
Infections	2 (4)	-	2 (4)
Nausea	2 (4)	-	2 (4)
Rash	1 (2)	-	1 (2)
Transaminitis	11 (24)	2 (4)	13 (28)
Haematologic
Anaemia	4 (9)	1 (2)	5 (11)
Neutropenia	3 (6)	4 (9)	7 (15)
Thrombocytopenia	3 (6)	2 (4)	5 (11)
