# Supplementary material for: A phase 1 dose-escalation study of low-dose lenalidomide maintenance post-allogeneic stem cell transplantation for high-risk acute myeloid leukaemia or myelodysplastic syndrome
Source: Research Square preprint supplement (doi:10.21203/rs.3.rs-3353988/v1), 2023-09-29
Supplement: Supplementary file 2 [file 345abfb4abe3c994b5ee3a11.xlsx]

## Sheet: Sheet1
Table 1. Patient demographics and baseline characteristics.
Patients (N=15)	N (%)
Age (years)
Median (range)	53 (18-63)
Sex
Female	6 (40)
Male	9 (60)
ECOG status
0 - 1	9 (60)
2	6 (40)
Disease
AML	13 (87)
MDS	2 (13)
HCT-CI score
0 - 2	6 (40)
3 - 4	5 (33)
≥ 5	4 (27)
Conditioning
MAC	6 (40)
RIC	9 (60)
Donor type
Sibling	8 (53)
Unrelated donor	7 (47)
Disease status at transplant (for AML)
CR1	10 (77)
CR2	3 (23)
Disease-risk index
Intermediate	11 (73)
High / Very High	4 (27)
MRD status, pre-alloSCT
Positive	8 (73)
Negative	3 (27)
MRD status, day +30 alloSCT
Positive	4 (29)
Negative	10 (71)
AML, acute myeloid leukaemia; CR, complete remission; ECOG, Eastern Cooperative Oncology Group; HCT-CI, haematopoietic comorbidity index; HLA, human leukocyte antigen; MAC, myeloablative conditioning; MDS, myelodysplastic syndrome; MRD, measurable residual disease; RIC, reduced-intensity conditioning
